# Supplementary material for: Structure of Jahn–Teller distorted solvated copper(ii) ions in solution, and in solids with apparently regular octahedral coordination geometry
Source: Royal Society of Chemistry journal article supplement (doi:10.1039/b200698g), 2002-01-01
Supplement: cu_supp.pdf [file cu_supp.pdf]

## Supplementary Material

*Table S1.* a/ Atomic coordinates ( $\times 10^4$ ) and equivalent isotropic displacement parameters ( $\text{\AA}^2 \times 10^3$ ) for  $\text{Cu}(\text{Me}_2\text{SO})_6(\text{ClO}_4)_2 \cdot 2\text{Me}_2\text{SO}$ .  $U_{\text{eq}}$  is defined as one third of the trace of the orthogonalized  $U_{ij}$  tensor, b/ anisotropic displacement parameters ( $\text{\AA}^2 \times 10^3$ ) for  $\text{Cu}(\text{OSMe}_2)_6(\text{ClO}_4)_2 \cdot 2\text{Me}_2\text{SO}$ . The anisotropic displacement factor exponent takes the form:  $-2\pi^2 [ h^2 a^{*2} U_{11} + \dots + 2 h k a^* b^* U_{12} ]$  and c/ hydrogen coordinates ( $\times 10^4$ ) and isotropic displacement parameters ( $\text{\AA}^2 \times 10^3$ ) for  $\text{Cu}(\text{OSMe}_2)_6(\text{ClO}_4)_2 \cdot 2\text{Me}_2\text{SO}$

*Table S2.* Interatomic bond distances ( $\text{\AA}$ ) and angles ( $^\circ$ ) in the structure of hexakis(dimethylsulfoxide)copper(II) perchlorate didimethylsulfoxide.

*Table S3.* Fractional atomic coordinates and equivalent isotropic displacement coefficients ( $\text{\AA}^2$ ) for the structure of hexakis(dimethylsulfoxide) tetrakis(dimethylsulfoxide)-bishydroxocopper(II) perchlorate.

*Table S4.* Interatomic bond distances ( $\text{\AA}$ ) and angles ( $^\circ$ ) in the structure of tetrakis(dimethylsulfoxide)bishydroxocopper(II) perchlorate.

*Figure S1.* The Fourier transforms and the fit of solid hexaaquacopper(II) bromate (offset 10.5), solid hexaaquacopper(II) hexafluorosilicate (offset 9.0), an aqueous solution of copper(II) perchlorate (offset 7.5), solid hexakis(pyridine-1-oxide)copper(II) perchlorate (offset 6.0), solid tetrakis(pyridine-1-oxide)copper(II) perchlorate (offset 4.5), solid hexakis(dimethylsulfoxide)copper(II) perchlorate (offset 3.0), dimethylsulfoxide solution of copper(II) perchlorate (offset 1.5) and *N,N'*-dimethylpropyleneurea solution of copper(II) trifluoromethanesulfonate.

*Figure S2.* The fit and the individual contribution of the different scattering paths of the EXAFS data of

a/ solid hexaaquacopper(II) bromate, solid line - experimental data and dashed line - model. Individual contributions: Cu- $O_{\text{eq}}$  single scattering - solid line (offset -4), Cu- $O_{\text{ax}}$  single scattering - dashed line (offset -10), Cu- $O_{\text{eq}}$ - $O_{\text{eq}}$  linear multiple scattering - dotted line (offset -12), Cu- $O_{\text{eq}}$ -Cu- $O_{\text{eq}}$  linear multiple scattering - dash-dotted line (offset -14) and Cu- $O_{\text{eq}}$ -Cu- $O_{\text{eq}}$  linear multiple scattering - dash-dotted line (offset -16).

b/ solid hexaaquacopper(II) hexafluorosilicate, solid line - experimental data and dashed line - model. Individual contributions: Cu- $O_{\text{eq}}$  single scattering - solid line (offset -4), Cu- $O_{\text{ax}}$  single scattering - dashed line (offset -10), Cu- $O_{\text{eq}}$ - $O_{\text{eq}}$  linear multiple scattering - dotted line (offset -12), Cu- $O_{\text{eq}}$ -Cu- $O_{\text{eq}}$  linear multiple scattering - dash-dotted line (offset -14) and Cu- $O_{\text{eq}}$ -Cu- $O_{\text{eq}}$  linear multiple scattering - dash-dotted line (offset -16).

c/ aqueous solution of copper(II) perchlorate, solid line - experimental data and dashed line - model. Individual contributions: Cu- $O_{\text{eq}}$  single scattering - solid line (offset -4), Cu- $O_{\text{ax}}$  single scattering - dashed line (offset -10), Cu- $O_{\text{eq}}$ - $O_{\text{eq}}$  linear multiple scattering - dotted

line (offset -12), Cu-O<sub>eq</sub>-Cu-O<sub>eq</sub> linear multiple scattering - dash-dotted line (offset -14) and Cu-O<sub>eq</sub>-Cu-O<sub>eq</sub> linear multiple scattering - dash-dotted line (offset -16).

d/ solid hexakis(pyridine-1-oxide)copper(II) perchlorate, solid line - experimental data and dashed line - model. Individual contributions: Cu-O<sub>eq</sub> single scattering - solid line (offset -4), Cu···N<sub>eq</sub> single scattering - dashed line (offset -10), Cu-O<sub>eq</sub>-N<sub>eq</sub> three-leg scattering path - dotted line (offset -12), Cu-O<sub>eq</sub>-O<sub>eq</sub> linear multiple scattering - dotted line (offset -14), Cu-O<sub>eq</sub>-Cu-O<sub>eq</sub> linear multiple scattering - dash-dotted line (offset -16) and Cu-O<sub>eq</sub>-Cu-O<sub>eq</sub> linear multiple scattering - dash-dotted line (offset -18).

e/ solid tetrakis(pyridine-1-oxide)copper(II) perchlorate, solid line - experimental data and dashed line - model. Individual contributions: Cu-O<sub>eq</sub> single scattering - solid line (offset -4), Cu···N<sub>eq</sub> single scattering - dashed line (offset -10), Cu-O<sub>eq</sub>-N<sub>eq</sub> three-leg scattering path - dotted line (offset -12), Cu-O<sub>eq</sub>-O<sub>eq</sub> linear multiple scattering - dotted line (offset -14), Cu-O<sub>eq</sub>-Cu-O<sub>eq</sub> linear multiple scattering - dash-dotted line (offset -16) and Cu-O<sub>eq</sub>-Cu-O<sub>eq</sub> linear multiple scattering - dash-dotted line (offset -18).

f/ solid hexakis(dimethylsulfoxide)copper(II) perchlorate, solid line - experimental data and dashed line - model. Individual contributions: Cu-O<sub>eq</sub> single scattering - solid line (offset -4), Cu-O<sub>ax</sub> single scattering - dashed line (offset -12), Cu···S<sub>eq</sub> single scattering - dotted line (offset -16), Cu-O<sub>eq</sub>-S<sub>eq</sub> three-leg scattering path - dash-dotted line (offset -20), Cu-O<sub>eq</sub>-O<sub>eq</sub> linear multiple scattering - dotted line (offset -22), Cu-O<sub>eq</sub>-Cu-O<sub>eq</sub> linear multiple scattering - dash-dotted line (offset -24) and Cu-O<sub>eq</sub>-Cu-O<sub>eq</sub> linear multiple scattering - dash-dotted line (offset -26).

g/ dimethylsulfoxide solution of copper(II) perchlorate, solid line - experimental data and dashed line - model. Individual contributions: Cu-O<sub>eq</sub> single scattering - solid line (offset -4), Cu···S<sub>eq</sub> single scattering - dotted line (offset -12), Cu-O<sub>eq</sub>-S<sub>eq</sub> three-leg scattering path - dash-dotted line (offset -16), Cu-O<sub>eq</sub>-O<sub>eq</sub> linear multiple scattering - dotted line (offset -18), Cu-O<sub>eq</sub>-Cu-O<sub>eq</sub> linear multiple scattering - dash-dotted line (offset -20) and Cu-O<sub>eq</sub>-Cu-O<sub>eq</sub> linear multiple scattering - dash-dotted line (offset -22).

h/ *N,N'*-dimethylpropyleneurea solution of copper(II) trifluoromethanesulfonate, solid line - experimental data and dashed line - model. Individual contributions: Cu-O single scattering - solid line (offset -4), Cu···C single scattering - dotted line (offset -10), Cu-O<sub>eq</sub>-O<sub>eq</sub> linear multiple scattering - dotted line (offset -12), Cu-O<sub>eq</sub>-Cu-O<sub>eq</sub> linear multiple scattering - dash-dotted line (offset -14) and Cu-O<sub>eq</sub>-Cu-O<sub>eq</sub> linear multiple scattering - dash-dotted line (offset -16).

*Figure S3.* Normalized absorption edges of the studied samples. A help line is inserted at 8998 eV.

**Table S1a.** Atomic coordinates ( $\times 10^4$ ) and equivalent isotropic displacement parameters ( $\text{\AA}^2 \times 10^3$ ) for  $\text{Cu(OSMe}_2)_6(\text{ClO}_4)_2 \cdot 2\text{Me}_2\text{SO}$ .  $U_{\text{eq}}$  is defined as one third of the trace of the orthogonalized  $U_{ij}$  tensor.

|       | <i>x</i> | <i>y</i> | <i>z</i> | $U_{\text{eq}}$ |
|-------|----------|----------|----------|-----------------|
| Cu(1) | 5000     | 0        | 0        | 49(1)           |
| S(2)  | 2915(2)  | -60(2)   | 2758(2)  | 82(1)           |
| S(3)  | 6521(2)  | 72(2)    | 1935(2)  | 62(1)           |
| S(1)  | 5201(2)  | -3192(2) | 1410(2)  | 68(1)           |
| S(4)  | 822(3)   | -4063(2) | 1158(2)  | 97(1)           |
| Cl(1) | 2841(2)  | 2757(2)  | 4397(2)  | 81(1)           |
| O(1)  | 6036(4)  | -1719(4) | 556(4)   | 60(1)           |
| O(2)  | 3329(5)  | -941(4)  | 1991(4)  | 76(1)           |
| O(3)  | 6231(4)  | 990(4)   | 615(4)   | 65(1)           |
| O(4)  | -157(6)  | -3158(5) | 445(5)   | 112(2)          |
| O(13) | 3223(7)  | 3429(6)  | 3005(5)  | 132(2)          |
| O(12) | 4044(9)  | 2242(8)  | 4772(7)  | 187(3)          |
| O(11) | 2441(10) | 3725(9)  | 4892(8)  | 194(3)          |
| O(14) | 1760(10) | 1678(8)  | 4953(7)  | 204(4)          |
| C(1A) | 6262(10) | -4181(7) | 602(8)   | 118(3)          |
| C(1B) | 5665(10) | -3870(7) | 2885(7)  | 108(3)          |
| C(2A) | 2269(10) | -1322(9) | 4455(7)  | 127(3)          |
| C(2B) | 1269(8)  | 581(8)   | 2570(8)  | 102(3)          |
| C(3A) | 6823(9)  | 1298(7)  | 2518(7)  | 95(2)           |
| C(3B) | 8317(7)  | -359(7)  | 1461(7)  | 80(2)           |
| C(4A) | -168(10) | -5695(8) | 2269(10) | 140(4)          |
| C(4B) | 933(9)   | -3492(8) | 2351(8)  | 102(3)          |

**Table 1b.** Anisotropic displacement parameters ( $\text{\AA}^2 \times 10^3$ ) for  $\text{Cu(OSMe}_2)_6(\text{ClO}_4)_2 \cdot 2\text{Me}_2\text{SO}$ . The anisotropic displacement factor exponent takes the form:  $-2\pi^2 [ h^2 a^{*2} U_{11} + \dots + 2 h k a^* b^* U_{12} ]$

|       | $U_{11}$ | $U_{22}$ | $U_{33}$ | $U_{23}$ | $U_{13}$ | $U_{12}$ |
|-------|----------|----------|----------|----------|----------|----------|
| Cu(1) | 41(1)    | 56(1)    | 46(1)    | -20(1)   | -15(1)   | 8(1)     |
| S(2)  | 56(1)    | 112(2)   | 90(1)    | -60(1)   | -16(1)   | 3(1)     |
| S(3)  | 50(1)    | 76(1)    | 50(1)    | -20(1)   | -16(1)   | 5(1)     |
| S(1)  | 54(1)    | 64(1)    | 77(1)    | -23(1)   | -23(1)   | 4(1)     |
| S(4)  | 96(2)    | 86(1)    | 103(2)   | -37(1)   | -32(1)   | 13(1)    |
| Cl(1) | 79(2)    | 83(1)    | 64(1)    | -21(1)   | -18(1)   | 7(1)     |
| O(1)  | 43(3)    | 65(3)    | 69(3)    | -23(2)   | -22(2)   | 8(2)     |
| O(2)  | 76(3)    | 73(3)    | 80(3)    | -39(2)   | -20(3)   | 5(2)     |
| O(3)  | 63(3)    | 71(3)    | 53(3)    | -19(2)   | -22(2)   | 9(2)     |
| O(4)  | 127(5)   | 80(3)    | 122(4)   | -16(3)   | -71(4)   | 17(3)    |

|       |        |        |        |         |        |         |
|-------|--------|--------|--------|---------|--------|---------|
| O(13) | 149(6) | 143(5) | 65(4)  | -18(3)  | -28(4) | 9(4)    |
| O(12) | 148(7) | 234(8) | 154(6) | -53(5)  | -76(6) | 97(6)   |
| O(11) | 222(9) | 200(7) | 182(7) | -126(6) | -40(7) | 58(7)   |
| O(14) | 190(9) | 207(7) | 144(6) | -32(5)  | -13(6) | -118(7) |
| C(1A) | 135(8) | 77(5)  | 133(7) | -58(5)  | -14(6) | 5(5)    |
| C(1B) | 147(9) | 79(5)  | 86(6)  | -15(4)  | -52(6) | -3(5)   |
| C(2A) | 135(9) | 167(8) | 80(6)  | -49(6)  | -43(6) | 25(7)   |
| C(2B) | 63(6)  | 137(7) | 109(6) | -60(5)  | -26(5) | 25(5)   |
| C(3A) | 103(7) | 111(6) | 85(5)  | -53(5)  | -34(5) | 21(5)   |
| C(3B) | 59(5)  | 82(5)  | 93(5)  | -31(4)  | -28(4) | 13(4)   |
| C(4A) | 135(9) | 91(6)  | 175(9) | -13(6)  | -91(8) | -6(6)   |
| C(4B) | 101(7) | 102(5) | 122(7) | -59(5)  | -51(6) | 25(5)   |

**Table 1c.** Hydrogen coordinates ( $\times 10^4$ ) and isotropic displacement parameters ( $\text{\AA}^2 \times 10^3$ ) for  $\text{Cu}(\text{OSMe}_2)_6(\text{ClO}_4)_2 \cdot 2\text{Me}_2\text{SO}$ .

|        | <i>x</i> | <i>y</i> | <i>z</i> | $U_{\text{eq}}$ |
|--------|----------|----------|----------|-----------------|
| H(1AA) | 6119     | -3922    | -254     | 177             |
| H(1AB) | 5971     | -5174    | 1171     | 177             |
| H(1AC) | 7268     | -3980    | 454      | 177             |
| H(1BA) | 5166     | -3429    | 3448     | 162             |
| H(1BB) | 6692     | -3682    | 2654     | 162             |
| H(1BC) | 5392     | -4874    | 3369     | 162             |
| H(2AA) | 3061     | -1785    | 4726     | 191             |
| H(2AB) | 1574     | -2010    | 4556     | 191             |
| H(2AC) | 1816     | -865     | 5015     | 191             |
| H(2BA) | 1441     | 1308     | 1661     | 153             |
| H(2BB) | 854      | 964      | 3203     | 153             |
| H(2BC) | 612      | -179     | 2743     | 153             |
| H(3AA) | 5925     | 1650     | 2822     | 142             |
| H(3AB) | 7508     | 2072     | 1791     | 142             |
| H(3AC) | 7199     | 839      | 3257     | 142             |
| H(3BA) | 8348     | -1038    | 1111     | 120             |
| H(3BB) | 8636     | -753     | 2241     | 120             |
| H(3BC) | 8942     | 481      | 775      | 120             |
| H(4AD) | -327     | -6159    | 1762     | 210             |
| H(4AE) | -1084    | -5564    | 2806     | 210             |
| H(4AF) | 358      | -6265    | 2855     | 210             |
| H(4BA) | 1467     | -2570    | 1884     | 152             |
| H(4BB) | 1417     | -4146    | 2934     | 152             |
| H(4BC) | -26      | -3447    | 2886     | 152             |

**Table S2.** Bond lengths [Å] and angles [°] for Cu(OSMe<sub>2</sub>)<sub>6</sub>(ClO<sub>4</sub>)<sub>2</sub>·2Me<sub>2</sub>SO.

---

|                     |            |
|---------------------|------------|
| Cu(1)-O(1)          | 1.990(4)   |
| Cu(1)-O(1)#1        | 1.990(4)   |
| Cu(1)-O(3)          | 2.083(4)   |
| Cu(1)-O(3)#1        | 2.083(4)   |
| Cu(1)-O(2)#1        | 2.182(4)   |
| Cu(1)-O(2)          | 2.182(4)   |
| S(2)-O(2)           | 1.507(4)   |
| S(2)-C(2A)          | 1.746(8)   |
| S(2)-C(2B)          | 1.757(7)   |
| S(3)-O(3)           | 1.519(4)   |
| S(3)-C(3B)          | 1.769(6)   |
| S(3)-C(3A)          | 1.770(7)   |
| S(1)-O(1)           | 1.527(4)   |
| S(1)-C(1B)          | 1.738(7)   |
| S(1)-C(1A)          | 1.783(7)   |
| S(4)-O(4)           | 1.496(5)   |
| S(4)-C(4A)          | 1.732(7)   |
| S(4)-C(4B)          | 1.760(7)   |
| Cl(1)-O(11)         | 1.362(7)   |
| Cl(1)-O(14)         | 1.368(7)   |
| Cl(1)-O(13)         | 1.375(5)   |
| Cl(1)-O(12)         | 1.386(7)   |
| O(1)-Cu(1)-O(1)#1   | 180.0(2)   |
| O(1)-Cu(1)-O(3)     | 90.97(15)  |
| O(1)#1-Cu(1)-O(3)   | 89.03(15)  |
| O(1)-Cu(1)-O(3)#1   | 89.03(15)  |
| O(1)#1-Cu(1)-O(3)#1 | 90.97(15)  |
| O(3)-Cu(1)-O(3)#1   | 180.00(18) |
| O(1)-Cu(1)-O(2)#1   | 90.32(15)  |
| O(1)#1-Cu(1)-O(2)#1 | 89.68(15)  |
| O(3)-Cu(1)-O(2)#1   | 86.83(16)  |
| O(3)#1-Cu(1)-O(2)#1 | 93.17(16)  |
| O(1)-Cu(1)-O(2)     | 89.68(15)  |
| O(1)#1-Cu(1)-O(2)   | 90.32(15)  |
| O(3)-Cu(1)-O(2)     | 93.17(16)  |
| O(3)#1-Cu(1)-O(2)   | 86.83(16)  |
| O(2)#1-Cu(1)-O(2)   | 180.0(2)   |
| O(2)-S(2)-C(2A)     | 103.4(3)   |
| O(2)-S(2)-C(2B)     | 106.8(3)   |
| C(2A)-S(2)-C(2B)    | 98.9(4)    |
| O(3)-S(3)-C(3B)     | 106.0(3)   |
| O(3)-S(3)-C(3A)     | 103.7(3)   |
| C(3B)-S(3)-C(3A)    | 98.6(4)    |

|                   |          |
|-------------------|----------|
| O(1)-S(1)-C(1B)   | 104.5(3) |
| O(1)-S(1)-C(1A)   | 101.9(3) |
| C(1B)-S(1)-C(1A)  | 99.2(4)  |
| O(4)-S(4)-C(4A)   | 106.3(4) |
| O(4)-S(4)-C(4B)   | 107.0(3) |
| C(4A)-S(4)-C(4B)  | 99.0(4)  |
| O(11)-Cl(1)-O(14) | 111.2(6) |
| O(11)-Cl(1)-O(13) | 109.1(4) |
| O(14)-Cl(1)-O(13) | 111.4(4) |
| O(11)-Cl(1)-O(12) | 105.0(5) |
| O(14)-Cl(1)-O(12) | 110.1(5) |
| O(13)-Cl(1)-O(12) | 109.7(4) |
| S(1)-O(1)-Cu(1)   | 120.9(2) |
| S(2)-O(2)-Cu(1)   | 117.8(2) |
| S(3)-O(3)-Cu(1)   | 116.4(2) |

---

Symmetry transformations used to generate equivalent atoms:

#1 -x+1,-y,-z
