# Supplementary figures and images for: Structure of Jahn–Teller distorted solvated copper(ii) ions in solution, and in solids with apparently regular octahedral coordination geometry
Source: Royal Society of Chemistry journal article supplement (doi:10.1039/b200698g), 2002-01-01

Fig. S1.

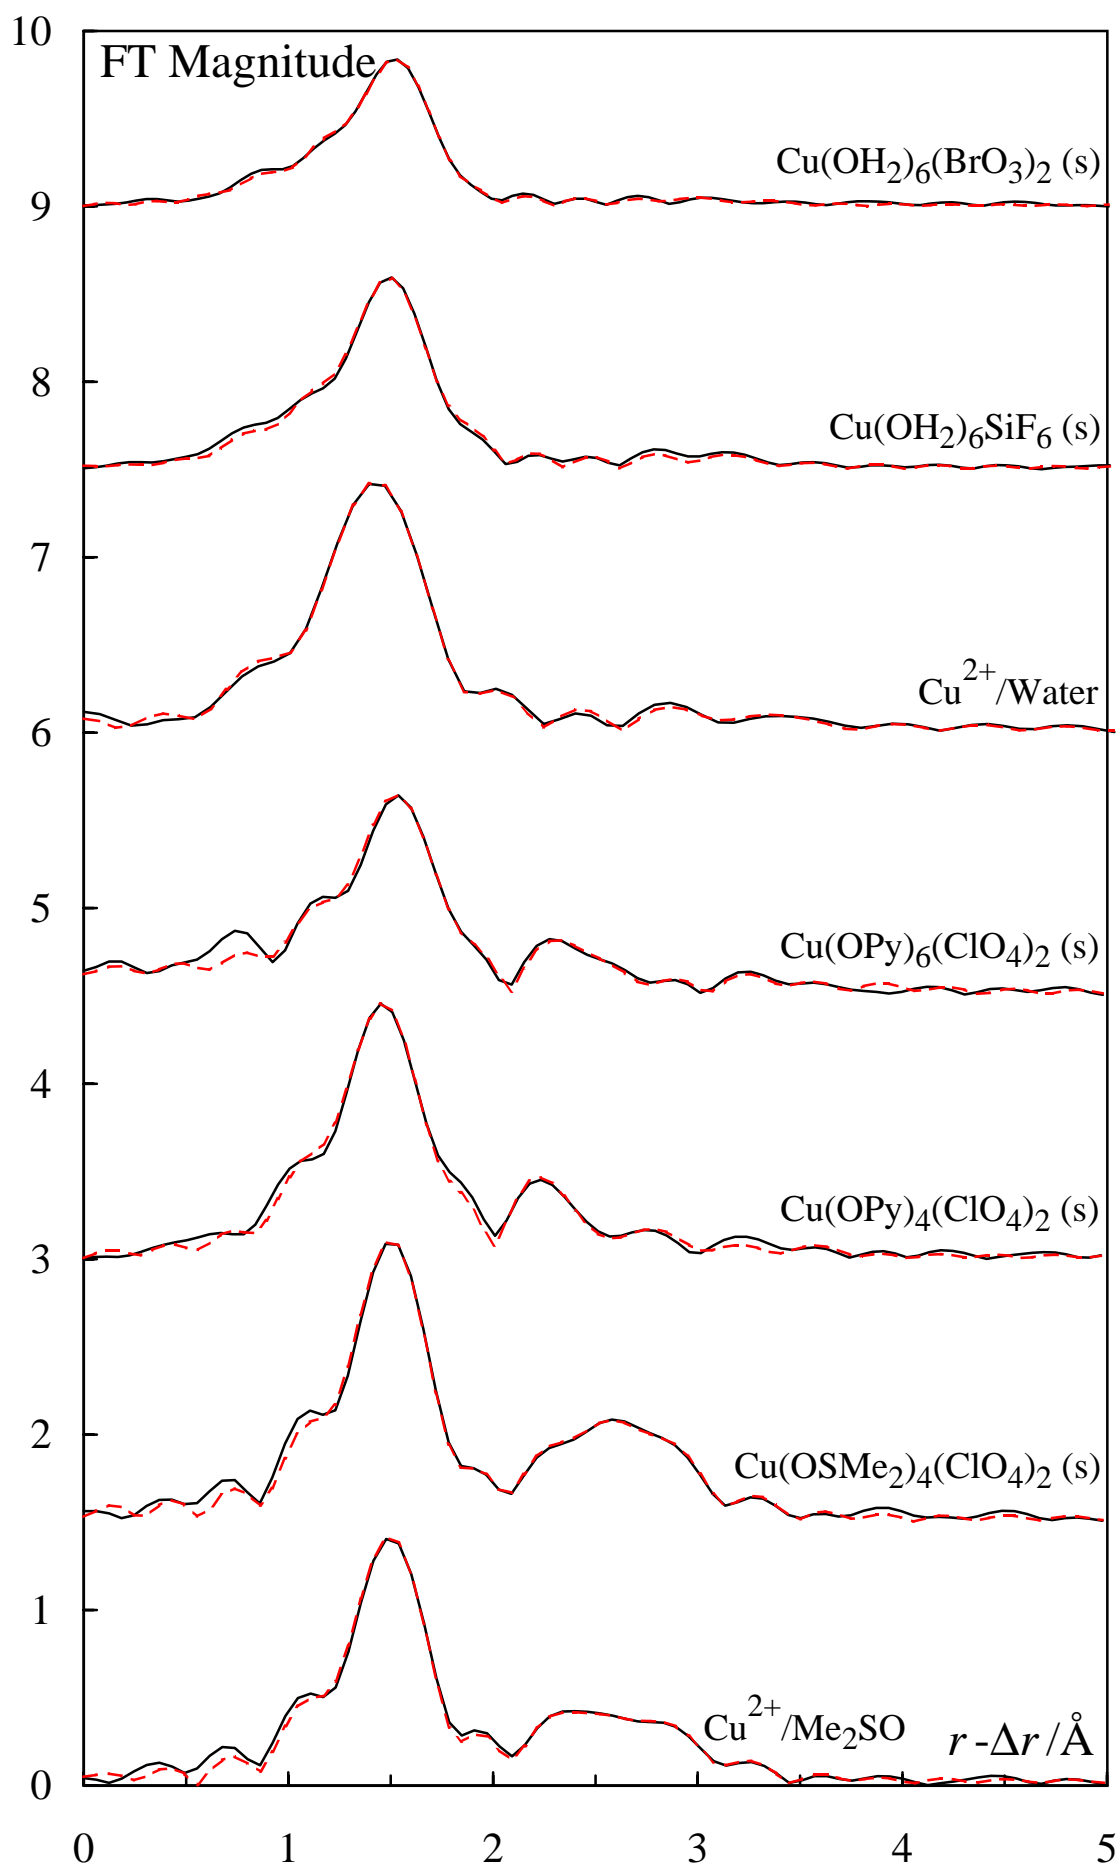

Supplement: b200698g-1.pdf [file b200698g-1.pdf]

Fig. S2a.

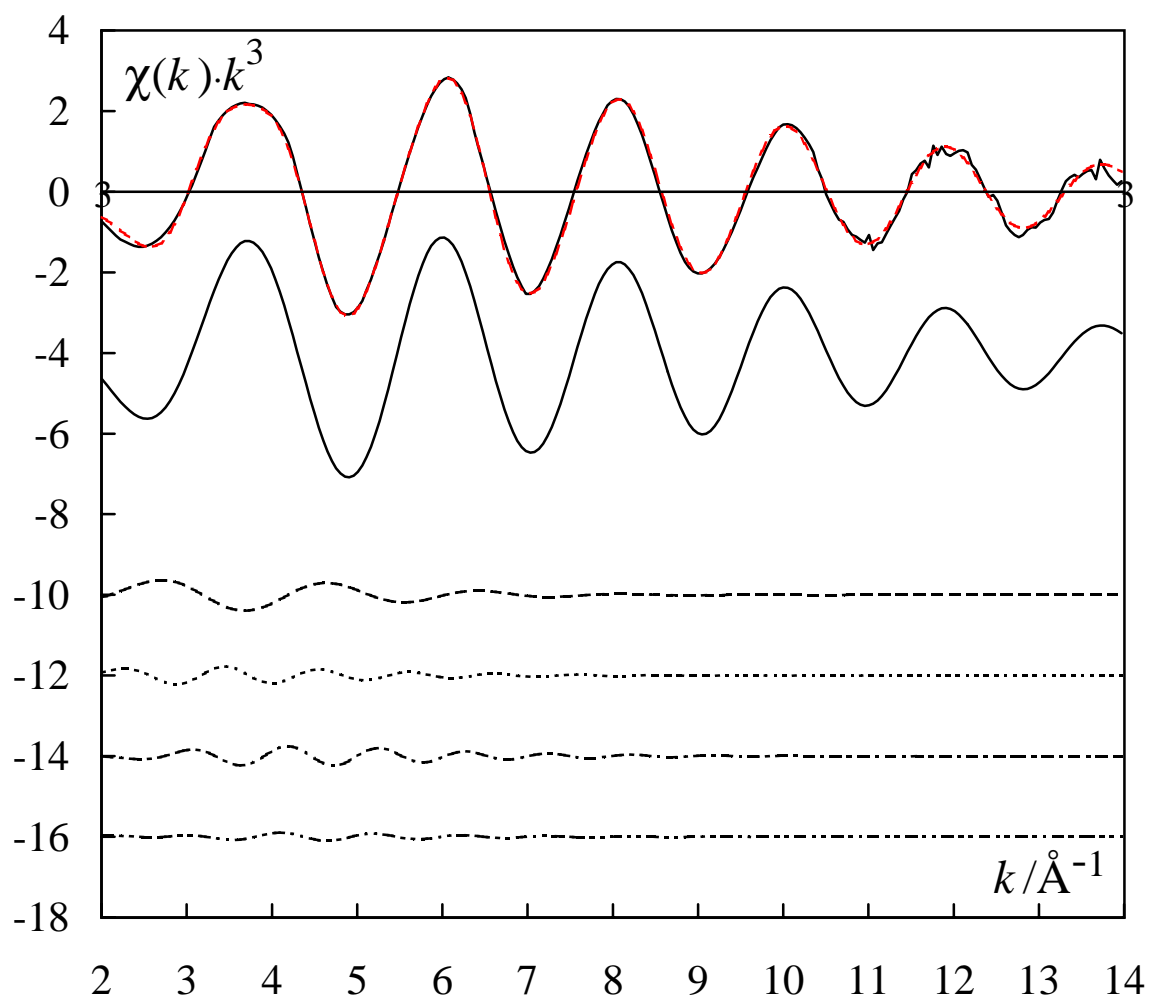

Supplement: b200698g-2a.pdf [file b200698g-2a.pdf]

Fig. S2b.

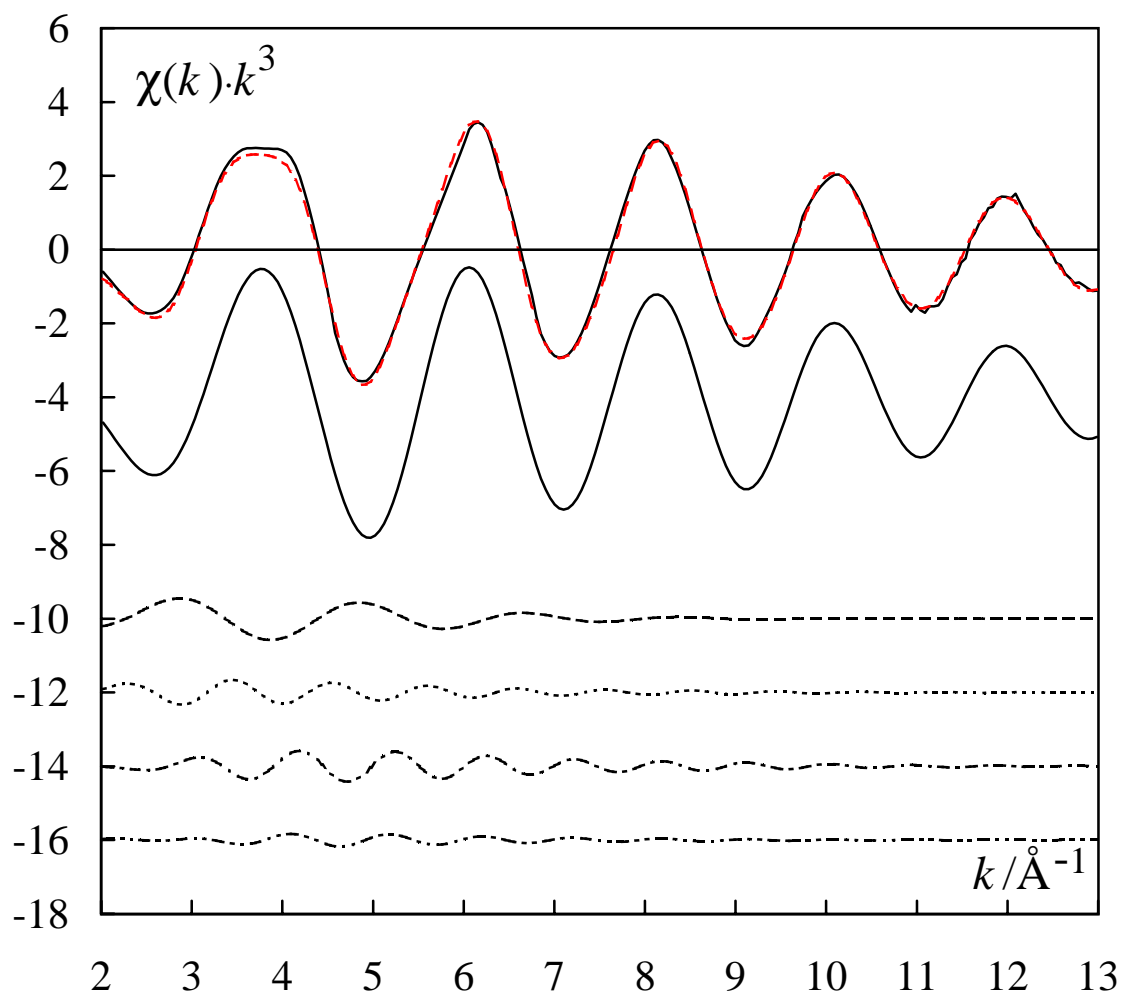

Supplement: b200698g-2b.pdf [file b200698g-2b.pdf]

Fig. S2c.

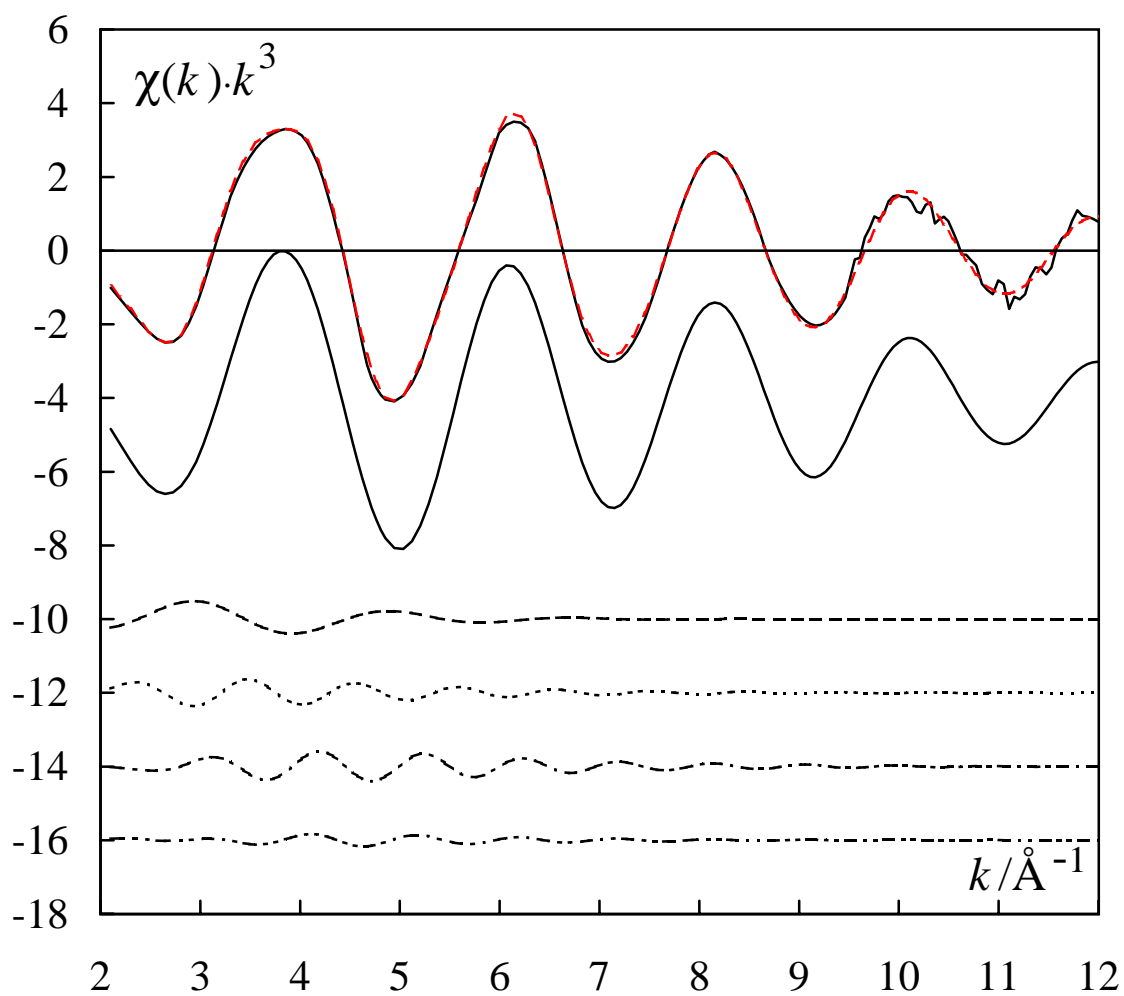

Supplement: b200698g-2c.pdf [file b200698g-2c.pdf]

Fig. S2d.

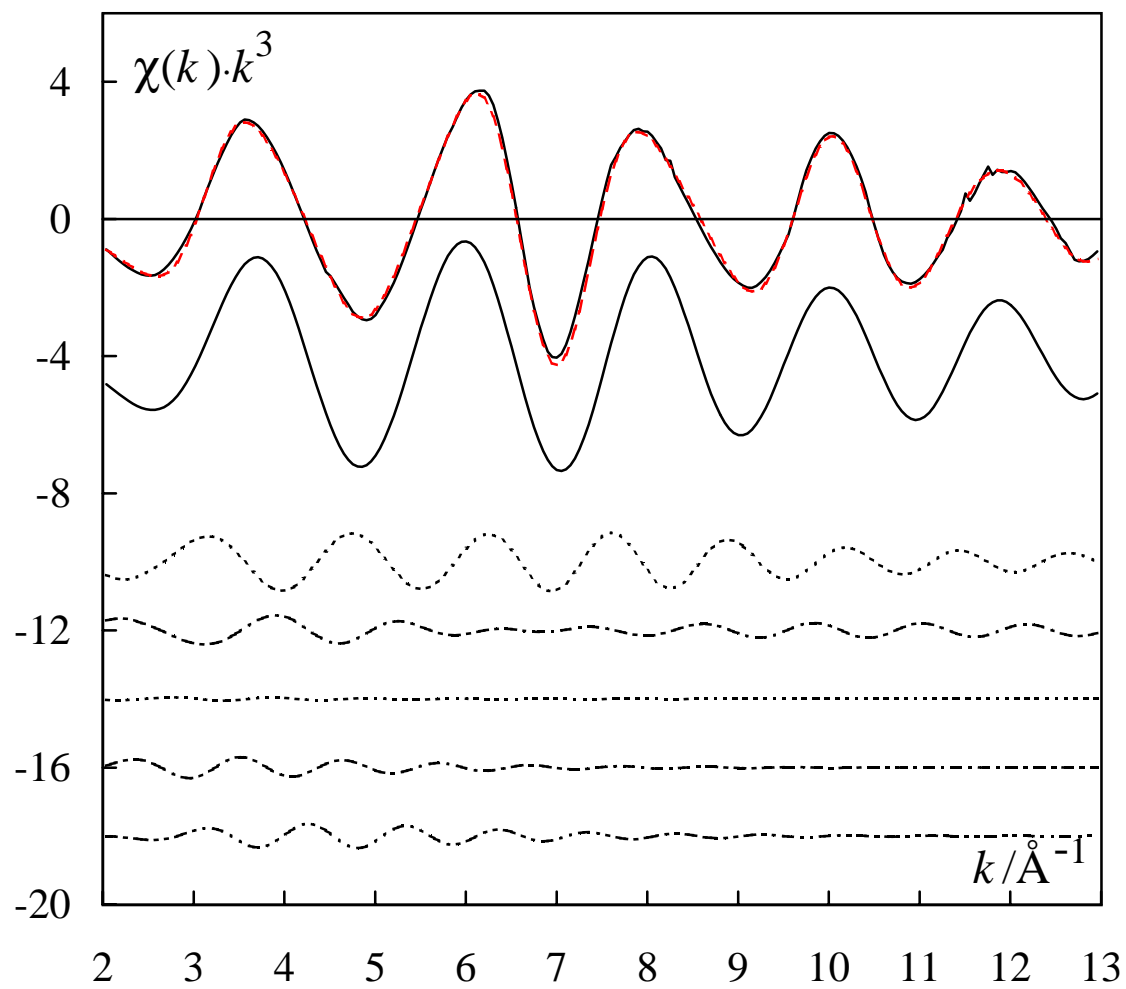

Supplement: b200698g-2d.pdf [file b200698g-2d.pdf]

Fig. S2e.

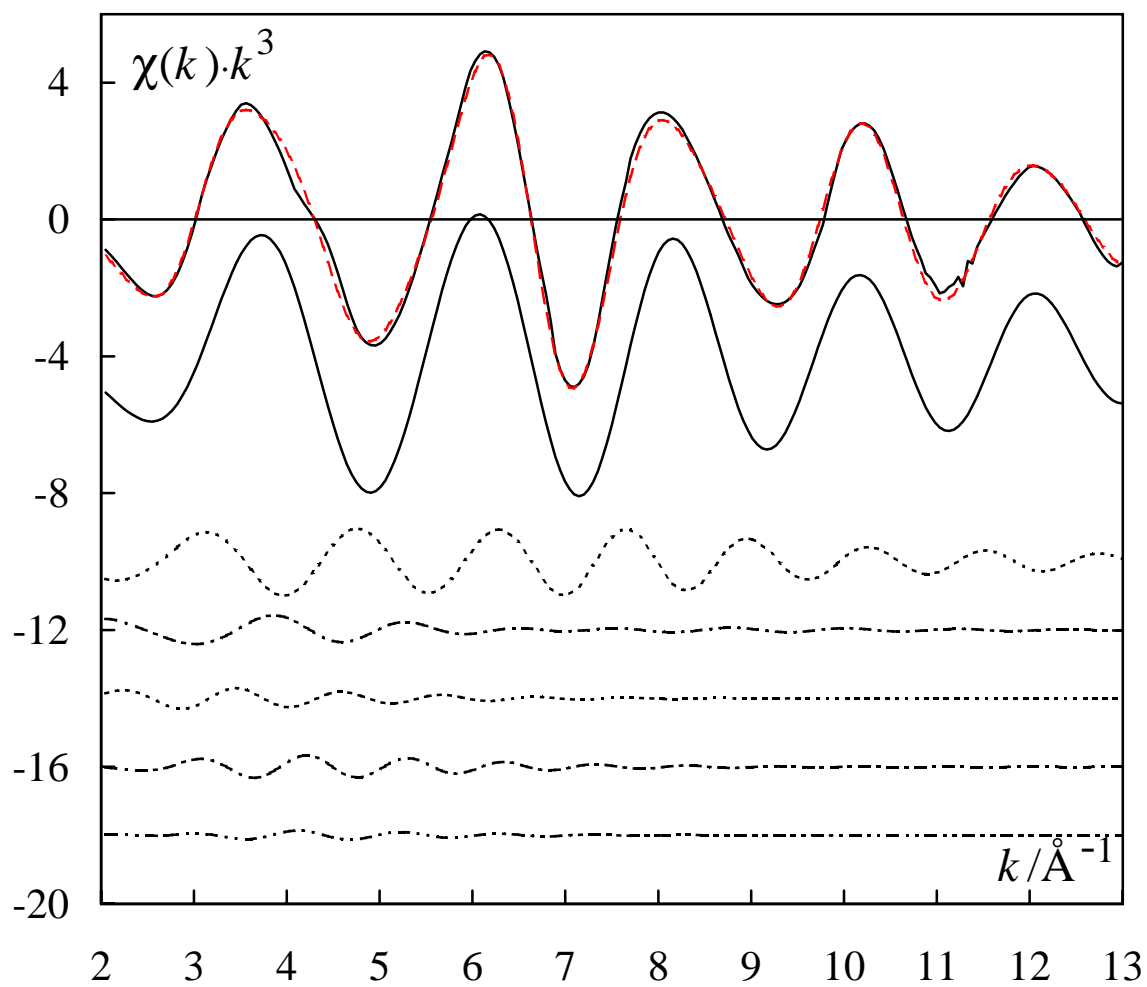

Supplement: b200698g-2e.pdf [file b200698g-2e.pdf]

Fig. S2f.

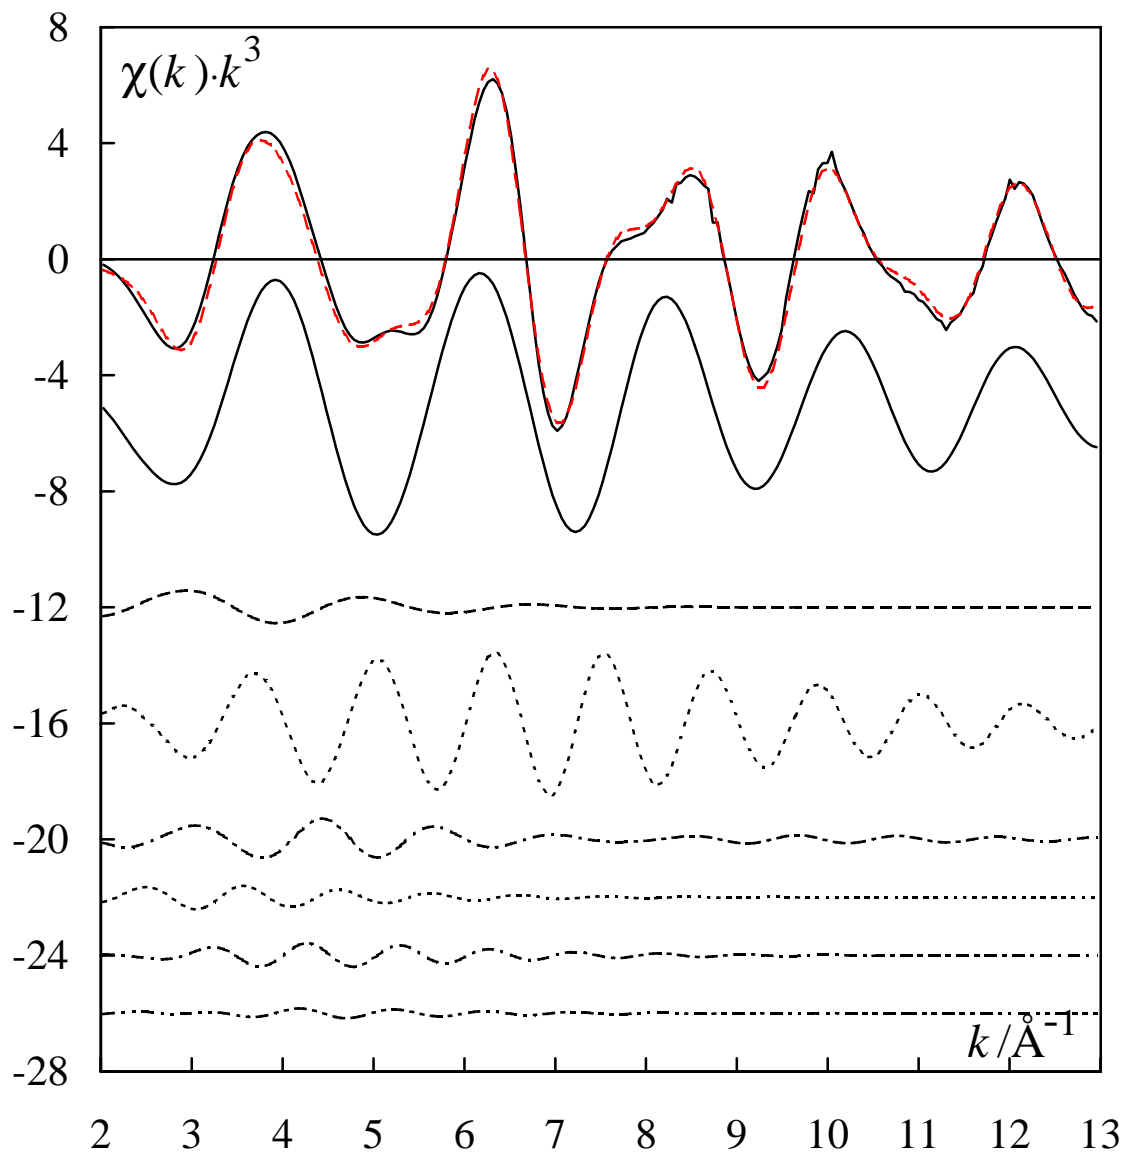

Supplement: b200698g-2f.pdf [file b200698g-2f.pdf]

Fig. S2g.

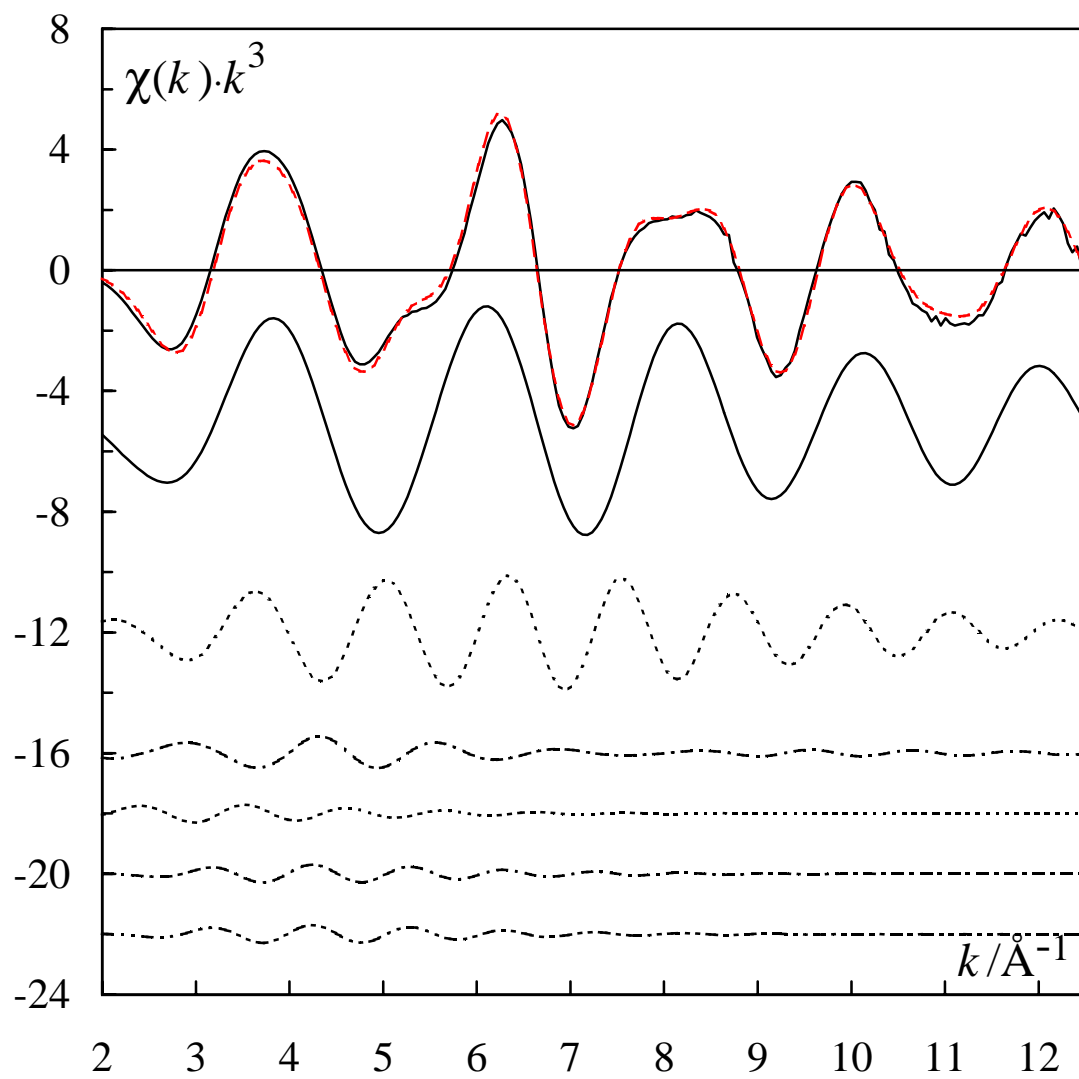

Supplement: b200698g-2g.pdf [file b200698g-2g.pdf]

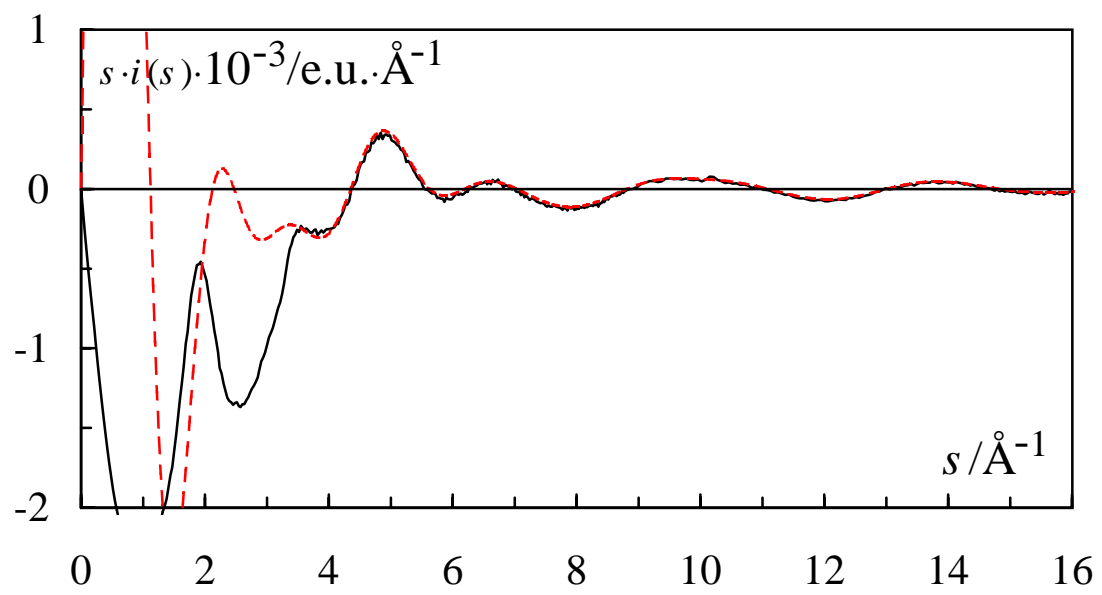

Supplement: b200698g-3al.pdf [file b200698g-3al.pdf]

Fig. S3a.

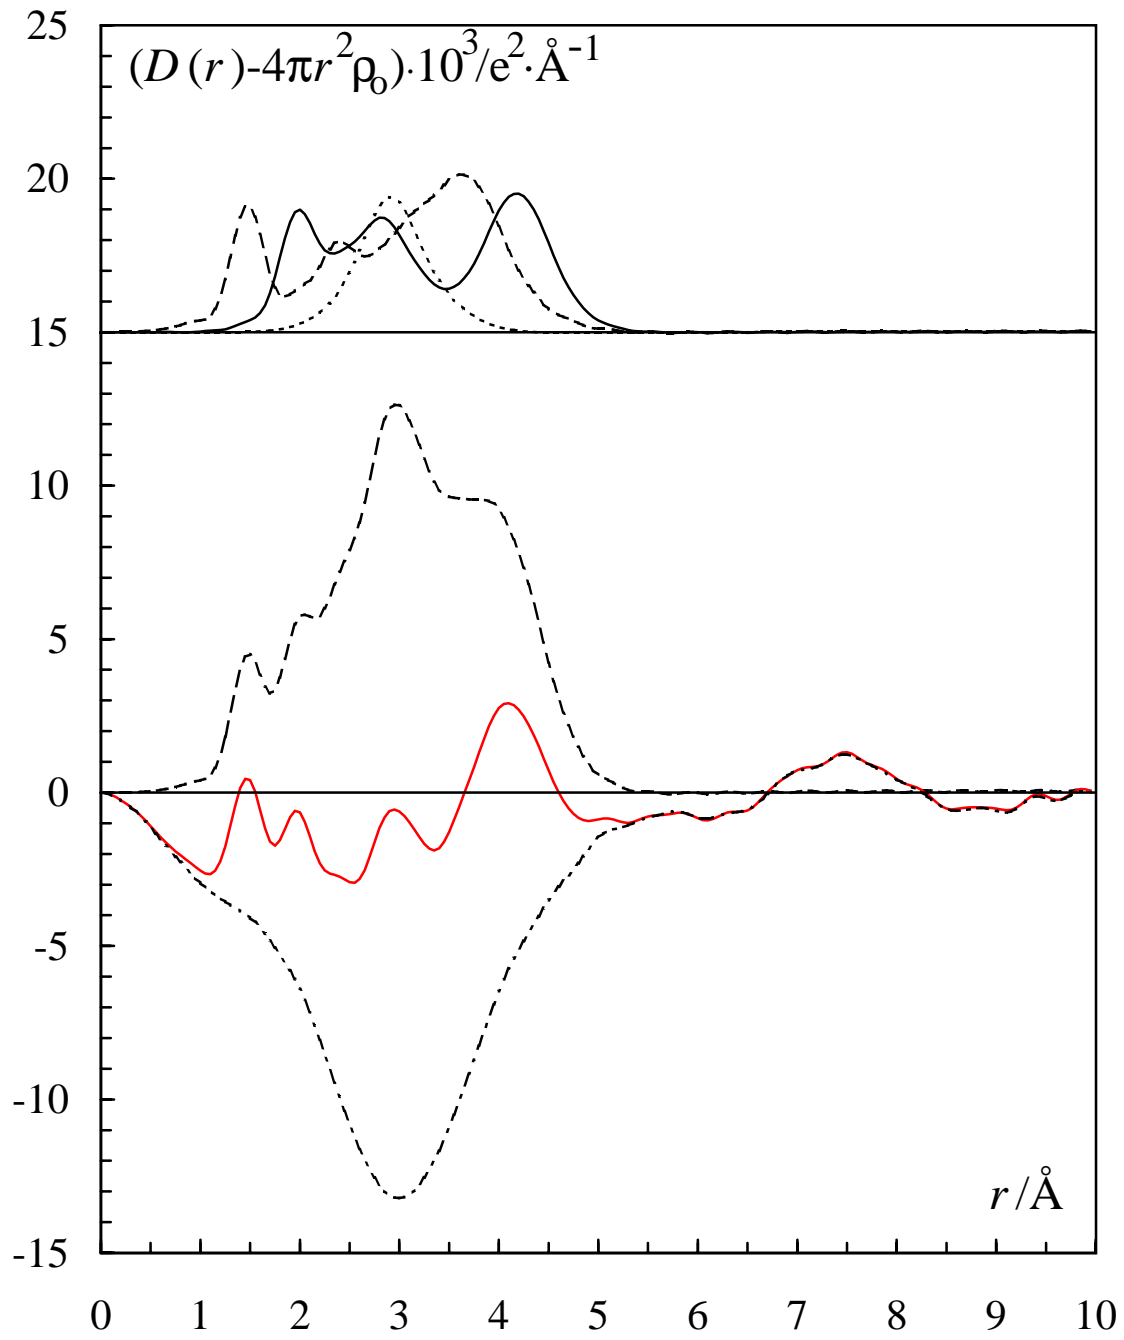

Supplement: b200698g-3au.pdf [file b200698g-3au.pdf]

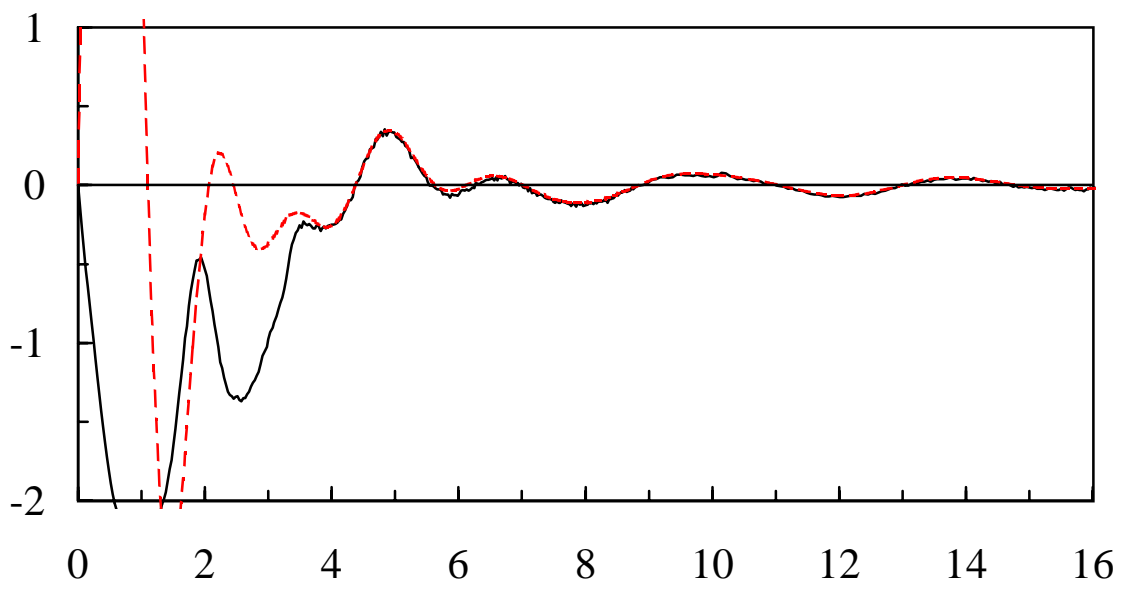

Supplement: b200698g-3bl.pdf [file b200698g-3bl.pdf]

Fig. S3b.

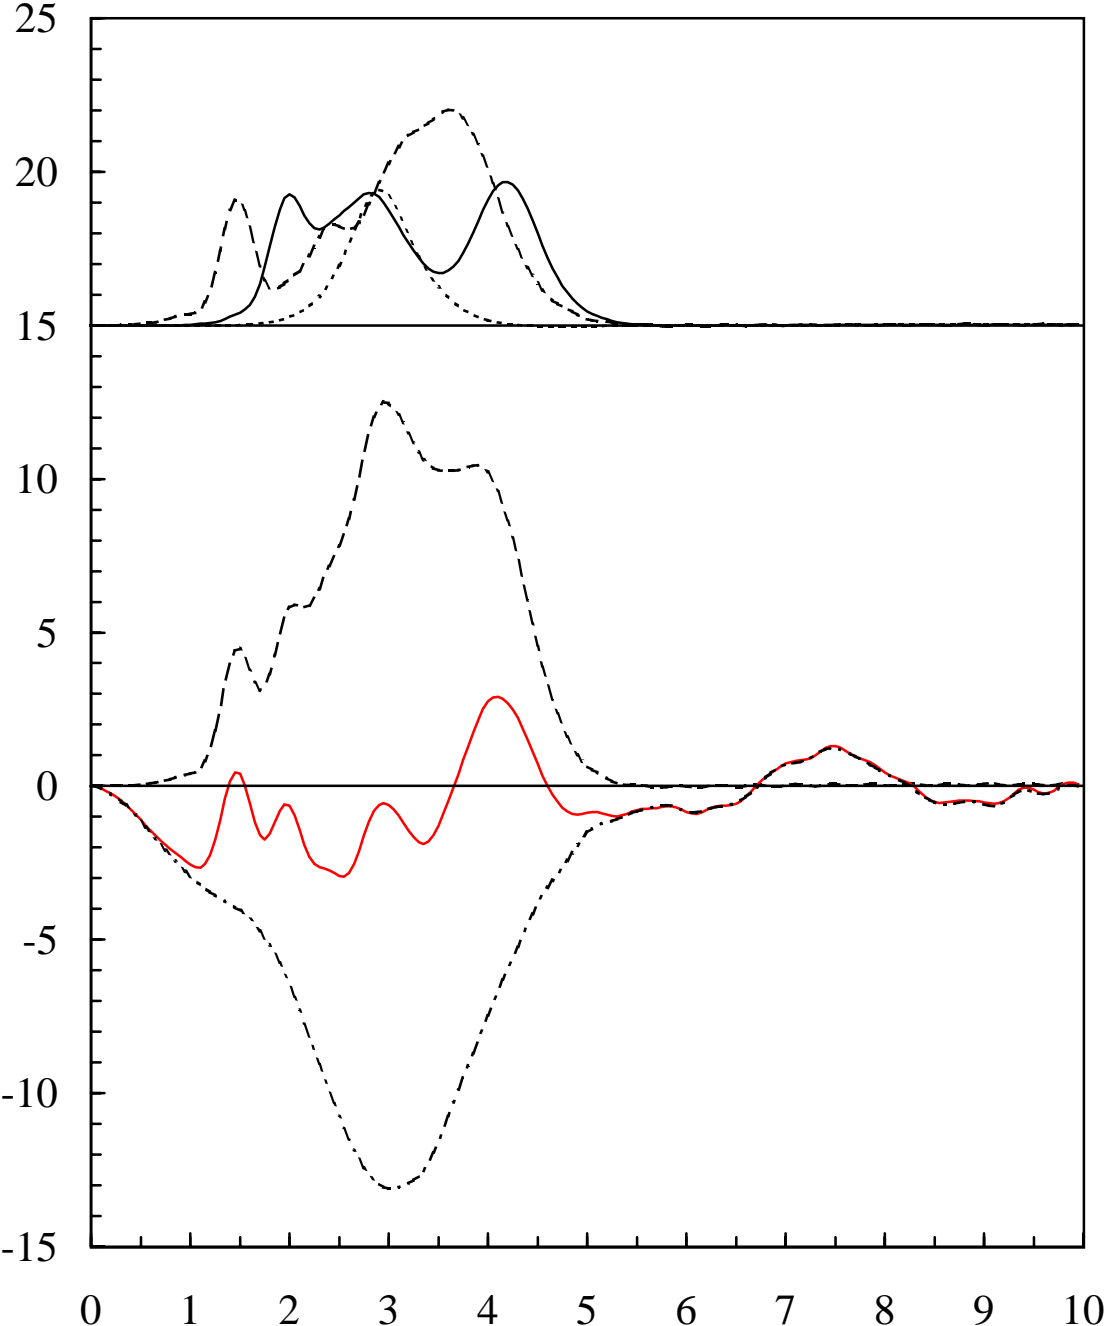

Supplement: b200698g-3bu.pdf [file b200698g-3bu.pdf]

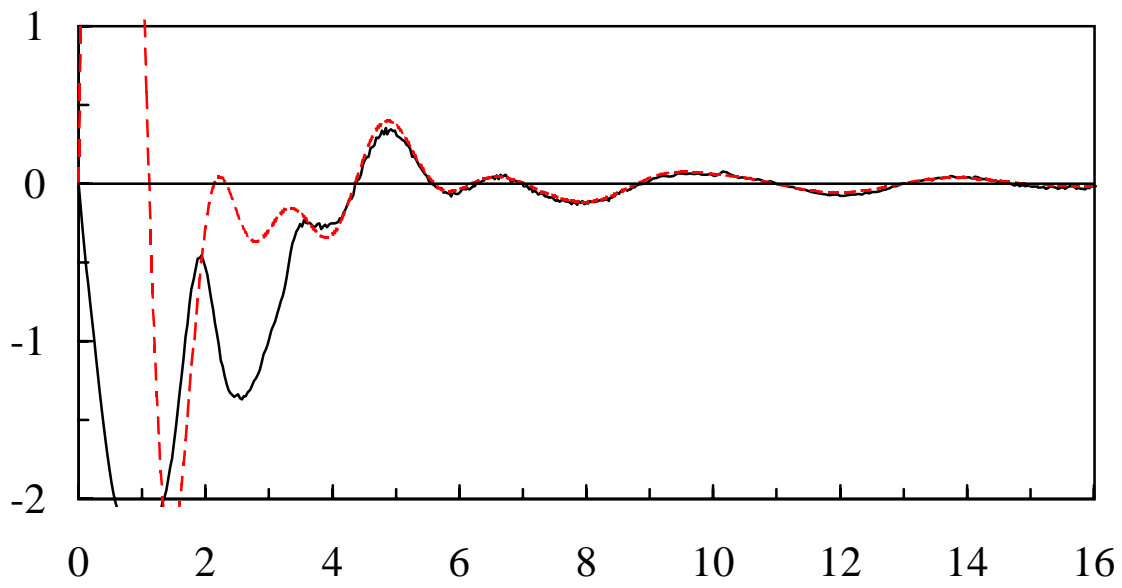

Supplement: b200698g-3cl.pdf [file b200698g-3cl.pdf]

Fig. S3c.

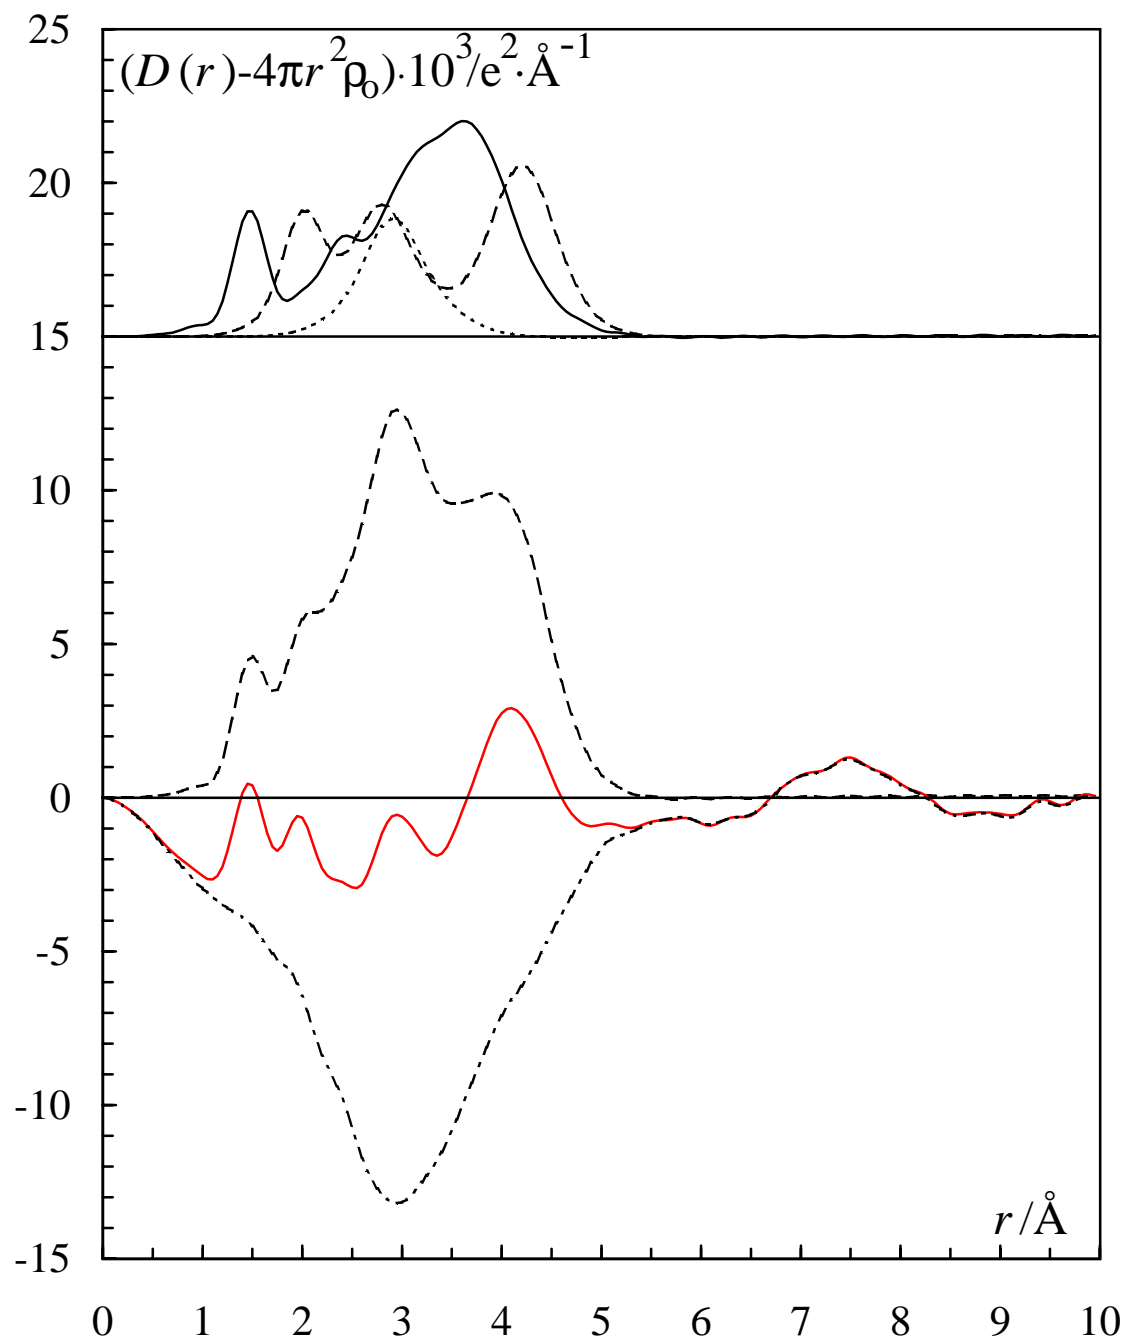

Supplement: b200698g-3cu.pdf [file b200698g-3cu.pdf]

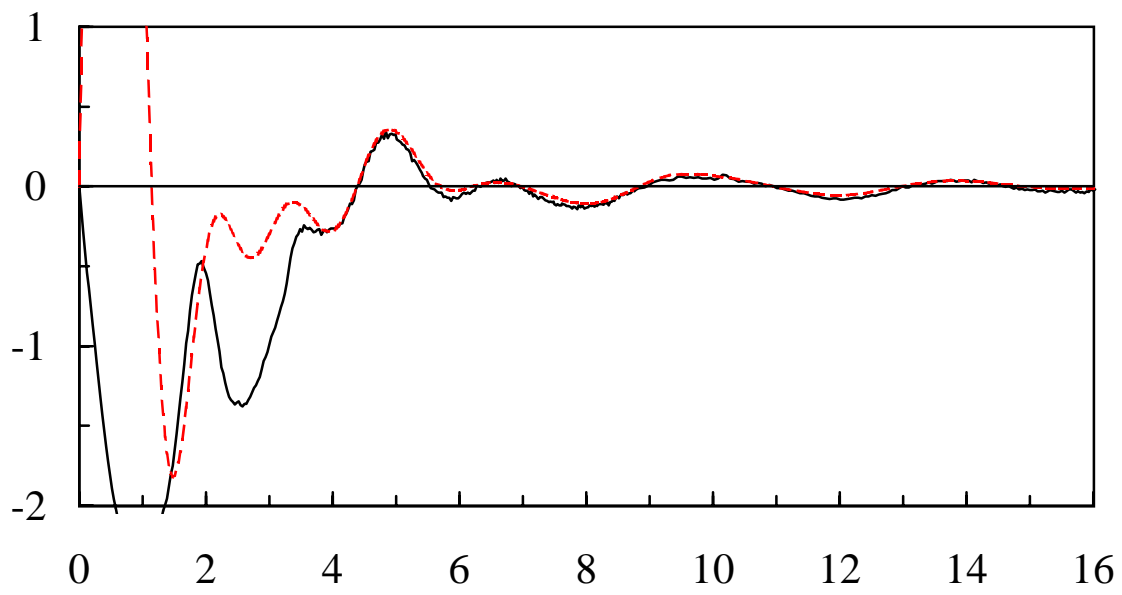

Supplement: b200698g-3dl.pdf [file b200698g-3dl.pdf]

Fig. S3d.

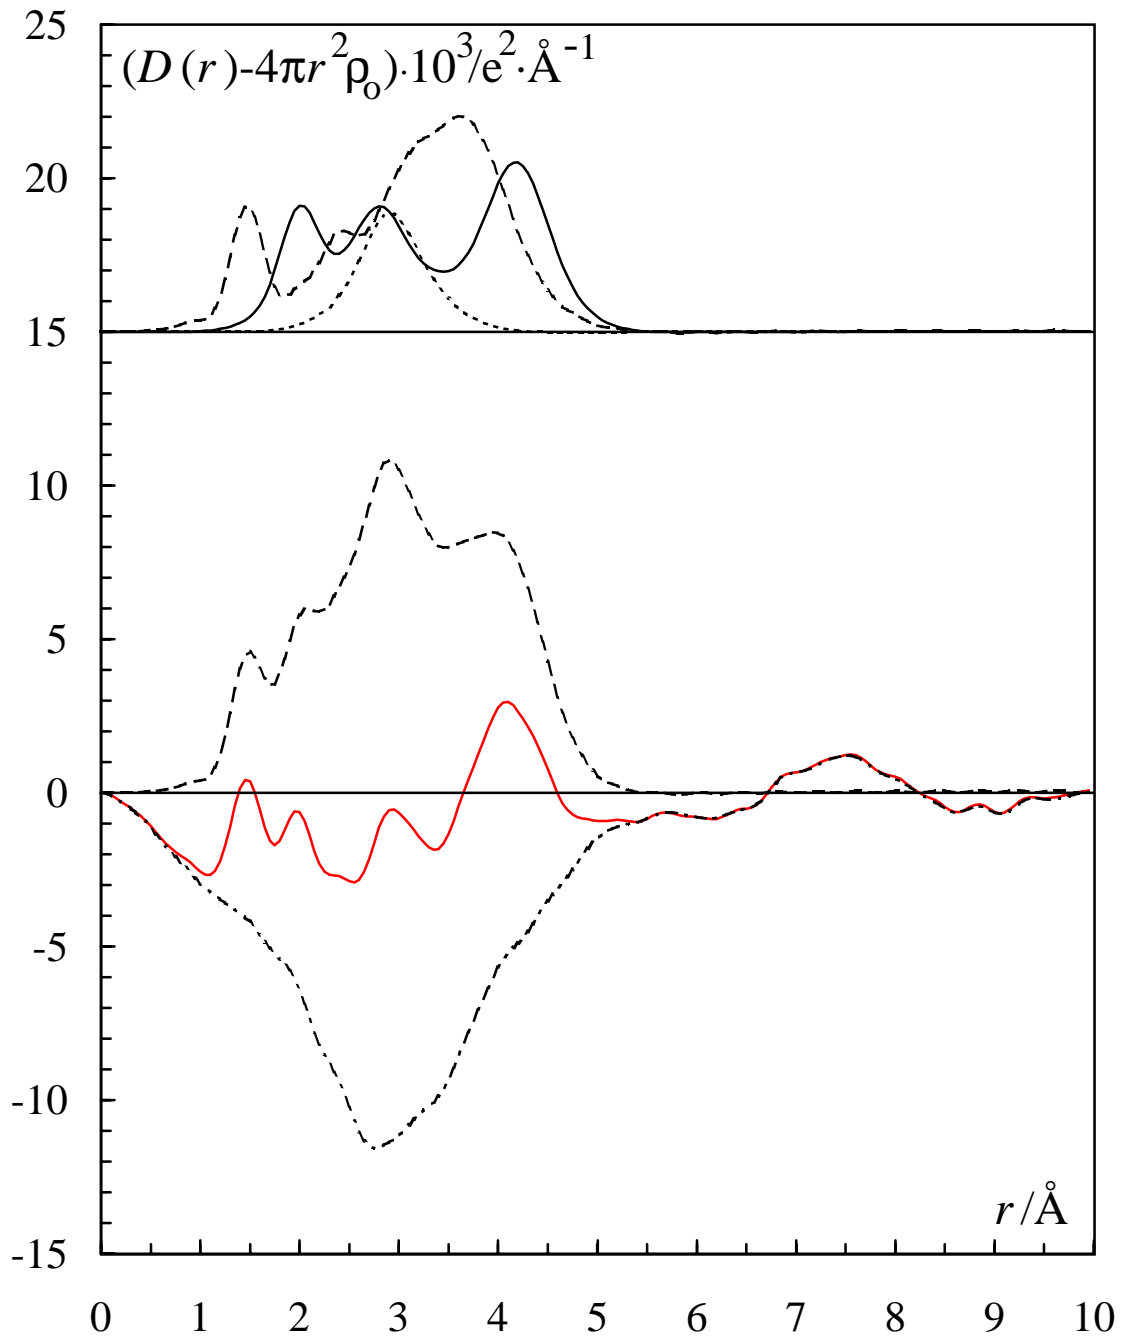

Supplement: b200698g-3du.pdf [file b200698g-3du.pdf]

Fig. S4.

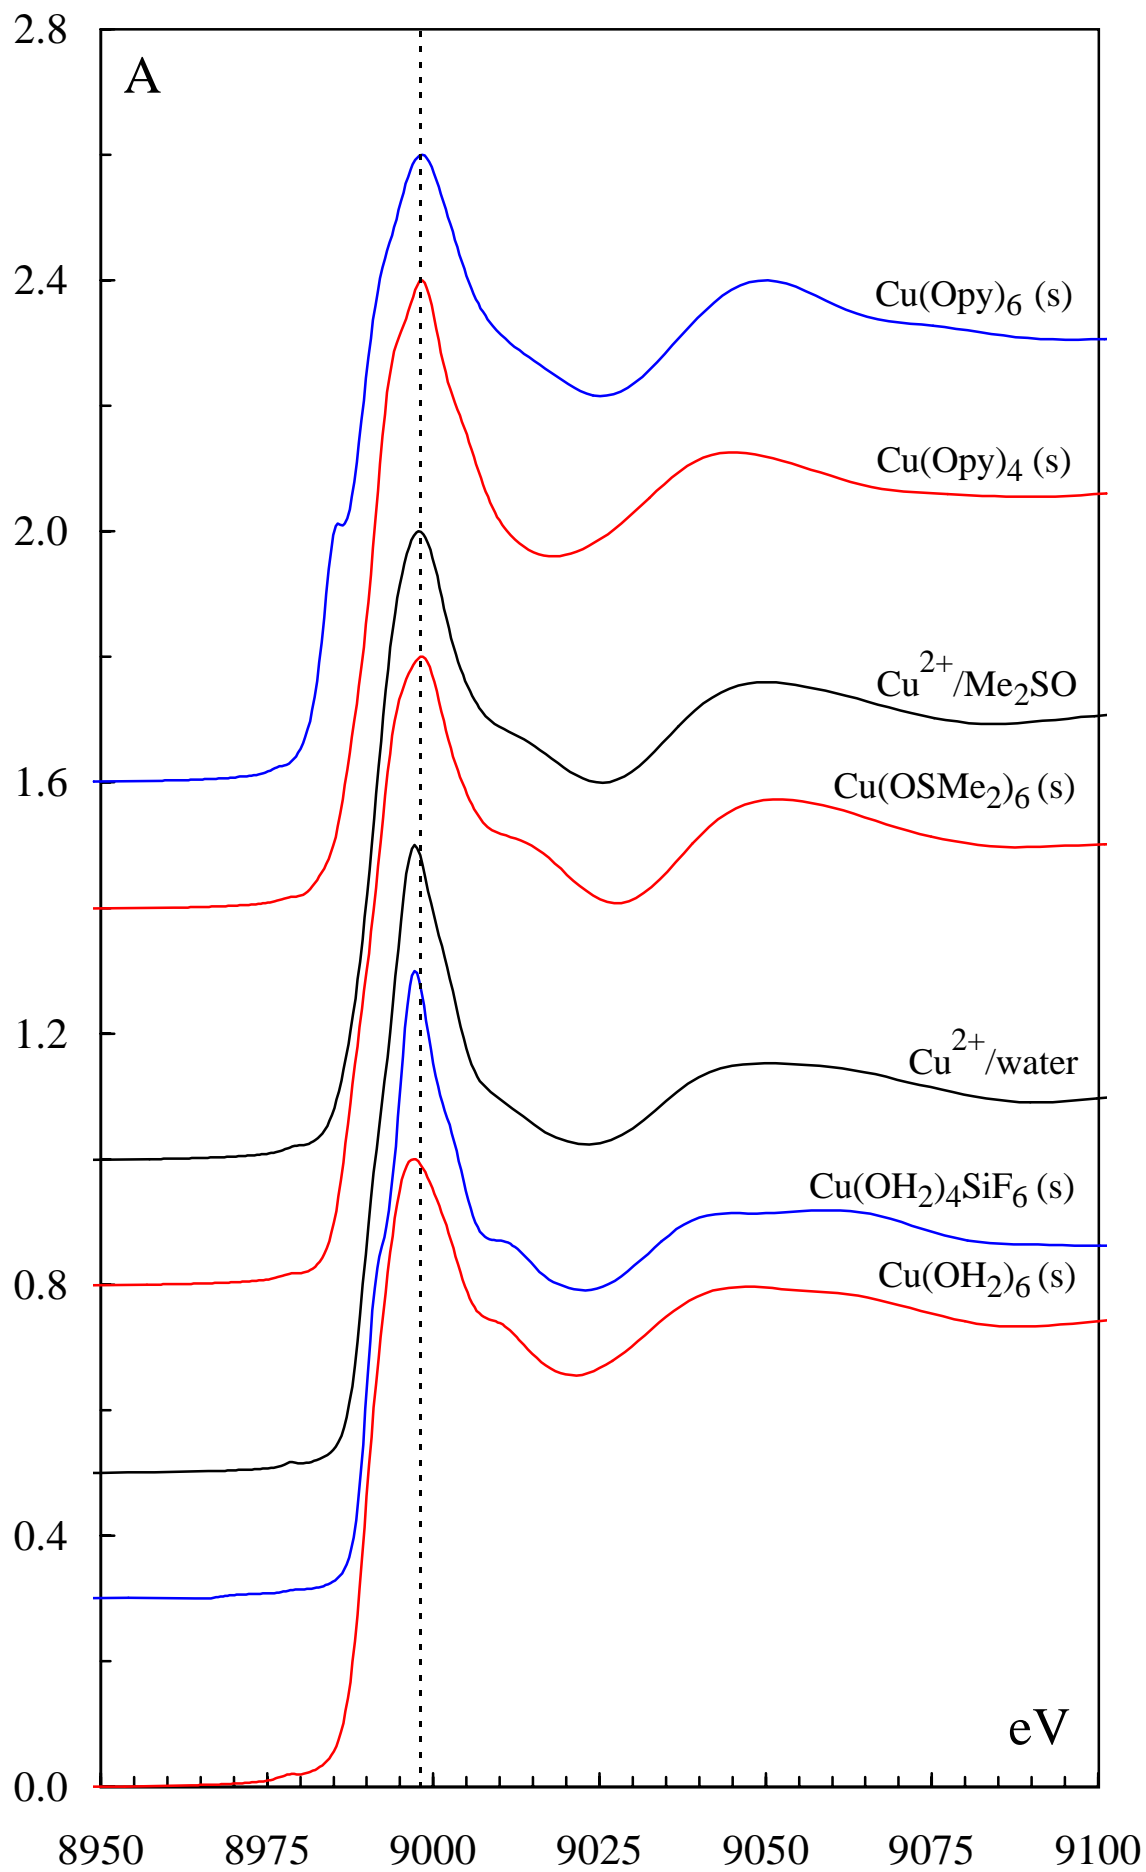

Supplement: b200698g-4.pdf [file b200698g-4.pdf]

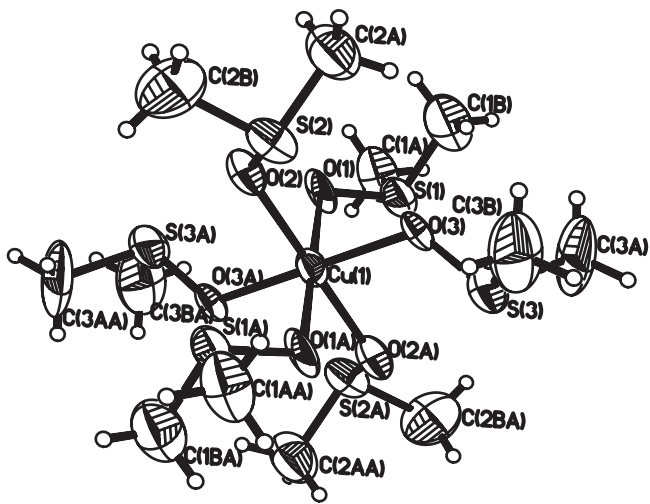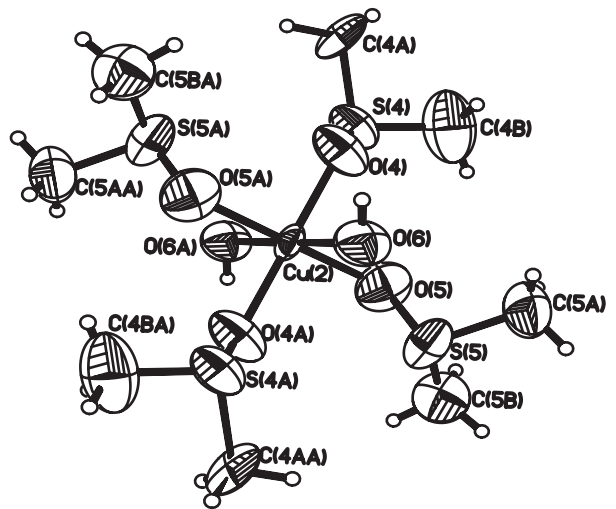

Supplement: b200698g-5.pdf [file b200698g-5.pdf]
